# Supplementary material for: Preparation of Recombinant Human Collagen III Protein Hydrogels with Sustained Release of Extracellular Vesicles for Skin Wound Healing
Source: MDPI journal article supplement (doi:10.3390/ijms23116289), 2022-06-03
Supplement: s1 [file s1]

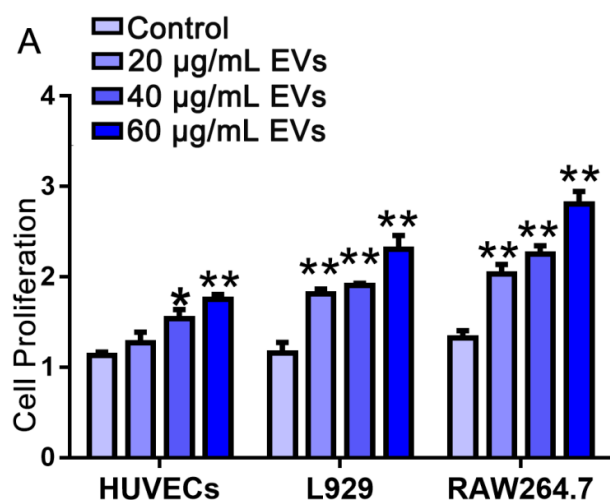

Figure S1 (A) The proliferation of HUVECs, L929 cells and RAW264.7 cells in different groups ( $n=3$ ,

\* $P$ -value $<0.05$  vs Control group, \*\* $P$ -value $<0.01$  vs Control group).
